# Supplementary material for: Severe Fever with Thrombocytopenia Syndrome, Japan, 2013–2017
Source: PubMed Central journal article supplement (PMC7101122; doi:10.3201/eid2604.191011), 2020-04
Supplement: 19-1011-Techapp-s1.pdf [file 19-1011-Techapp-s1.pdf]

# Severe Fever with Thrombocytopenia Syndrome, Japan, 2013–2017

## Appendix

**Appendix Table 1.** Clinical features of SFTS patients at the time of hospital visit in Japan, March 2013–October 2017

| Symptoms or signs            | No. (%)               |                      |                   | p-value* |
|------------------------------|-----------------------|----------------------|-------------------|----------|
|                              | All patients, N = 133 | Nonsurvivors, n = 36 | Survivors, n = 97 |          |
| Fever                        | 109 (82)              | 32 (89)              | 77 (79)           | 0.334    |
| Gastrointestinal symptoms    | 113 (85)              | 31 (86)              | 82 (85)           | 0.799    |
| Vomiting                     | 26 (20)               | 7 (19)               | 19 (20)           | 0.891    |
| Diarrhea                     | 57 (43)               | 17 (47)              | 40 (41)           | 0.541    |
| Abdominal pain               | 23 (17)               | 5 (14)               | 18 (19)           | 0.668    |
| Lymphadenopathy              | 28 (21)               | 7 (19)               | 21 (22)           | 0.974    |
| Arthralgia                   | 11 (8)                | 3 (8)                | 11 (11)           | 0.901    |
| Myalgia                      | 18 (14)               | 5 (14)               | 13 (13)           | 0.691    |
| Headache                     | 20 (15)               | 6 (17)               | 14 (14)           | 0.514    |
| Cough                        | 4 (3)                 | 1 (3)                | 3 (3)             | 0.96     |
| Sore throat                  | 7 (5)                 | 2 (6)                | 5 (5)             | 0.833    |
| Fatigue                      | 87 (65)               | 27 (75)              | 60 (62)           | 0.058    |
| Neurologic symptoms          | 80 (60)               | 22 (61)              | 58 (60)           | 0.877    |
| Disturbance of consciousness | 43 (32)               | 15 (42)              | 28 (29)           | 0.259    |
| Dysarthria                   | 7 (5)                 | 2 (6)                | 5 (5)             | 0.918    |
| Convulsion                   | 3 (2)                 | 2 (6)                | 1 (1)             | 0.118    |
| Weakness                     | 20 (15)               | 4 (11)               | 16 (16)           | 0.707    |
| Tremor                       | 7 (5)                 | 5 (14)               | 2 (2)             | 0.004    |
| Bleeding tendency            | 21 (16)               | 6 (17)               | 15 (15)           | 0.808    |
| Gingival hemorrhage          | 8 (6)                 | 4 (11)               | 4 (4)             | 0.095    |
| Subcutaneous hemorrhage      | 12 (9)                | 2 (6)                | 10 (10)           | 0.385    |

\*Pearson's chi-square test

**Appendix Table 2.** Laboratory data of SFTS patients at the time of hospital visit in Japan, March 2013–October 2017

| Laboratory data                 | Normal range                  | Median [IQR]          |                       |                   | p-value* |
|---------------------------------|-------------------------------|-----------------------|-----------------------|-------------------|----------|
|                                 |                               | All patients, N = 133 | Non-survivors, n = 36 | Survivors, n = 97 |          |
| Leukocyte (cells/ $\mu$ L)      | 3,300–8,600                   | 1670 [1275–2535]      | 1505 [1123–2063]      | 1700 [1350–2700]  | 0.129    |
| Hb (g/dL)                       | M: 13.7–16.8;<br>F: 11.6–14.8 | 14.0 [12.8–14.9]      | 13.9 [12.7–15.1]      | 14.0 [12.9–14.9]  | 0.804    |
| Platelet ( $\times 10^4/\mu$ L) | 15.8–34.8                     | 6.6 [4.8–9.7]         | 6.0 [4.1–9.2]         | 6.6 [5.0–9.9]     | 0.206    |
| TP (g/dL)                       | 6.6–8.1                       | 6.4 [6.0–6.9]         | 6.4 [5.9–6.8]         | 6.4 [6.0–7.0]     | 0.769    |
| Alb (g/dL)                      | 4.1–5.1                       | 3.6 [3.1–3.9]         | 3.4 [2.8–3.8]         | 3.7 [3.3–4.0]     | 0.06     |
| T-Bil (mg/dL)                   | 0.4–1.5                       | 0.5 [0.4–0.6]         | 0.6 [0.3–0.7]         | 0.4 [0.4–0.6]     | 0.045    |
| AST (IU/L)                      | 13–30                         | 129 [61–267]          | 227 [96–414]          | 117 [54–207]      | 0.004    |
| ALT (IU/L)                      | M: 10–42; F:<br>7–23          | 58 [36–111]           | 69 [46–181]           | 53 [29–95]        | 0.015    |
| LDH (IU/L)                      | 124–222                       | 435 [315–823]         | 598 [396–956]         | 416 [298–706]     | 0.012    |
| ALP (IU/L)                      | 106–322                       | 205 [169–264]         | 212 [172–353]         | 202 [167–257]     | 0.175    |
| BUN (mg/dL)                     | 8–22                          | 20.9 [15.3–28.0]      | 24.6 [17.1–38.3]      | 20.0 [14.0–25.7]  | 0.008    |
| Cr (mg/dL)                      | M: 0.65–1.07;<br>F: 0.46–0.79 | 0.90 [0.72–1.15]      | 1.04 [0.79–1.40]      | 0.83 [0.70–1.10]  | 0.05     |
| CRP (mg/dL)                     | 0.00–0.14                     | 0.27 [0.06–0.52]      | 0.37 [0.08–0.79]      | 0.18 [0.06–0.50]  | 0.078    |
| CK (IU/L)                       | M: 59–248; F:<br>41–153       | 326 [149–964]         | 368 [187–1235]        | 284 [143–964]     | 0.591    |
| AMY (IU/L)                      | 44–132                        | 96 [66–133]           | 121 [70–154]          | 91 [65–110]       | 0.074    |
| Na (mEq/L)                      | 138–145                       | 134 [131–137]         | 134 [132–137]         | 135 [131–137]     | 0.936    |
| K (mEq/L)                       | 3.6–4.8                       | 3.9 [3.6–4.2]         | 4.1 [3.8–4.2]         | 3.8 [3.5–4.2]     | 0.021    |
| Cl (mEq/L)                      | 101–108                       | 100 [97–103]          | 100 [98–103]          | 100 [96–103]      | 0.404    |
| APTT (sec)                      | 24.5–33.8                     | 44.9 [38.7–50.9]      | 47.0 [43.6–56.2]      | 43.0 [37.3–48.9]  | 0.007    |

IQR, interquartile range; leukocyte, leukocyte; Hb, hemoglobin; TP, total protein; Alb, albumin; T-Bil, total bilirubin; AST, aspartate transaminase;

ALT, alanine aminotransferase; LDH, lactate dehydrogenase; ALP, alkaline phosphatase; BUN, blood urea nitrogen; Cr, creatinine;

CRP, C-reactive protein; CK, creatine kinase; AMY, amylase; Na, sodium; K, potassium; Cl, chlorine; APTT, activated partial thromboplastin time.

\*Wilcoxon rank sum test.

**A**  
2013

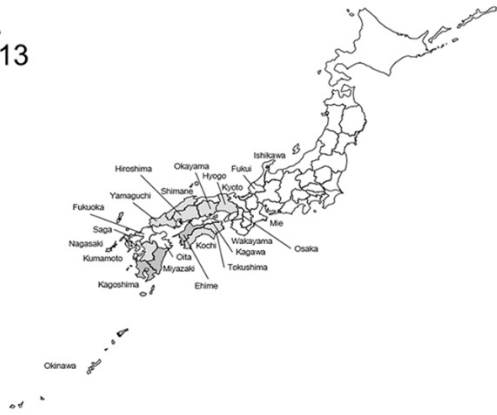

**B**  
2015

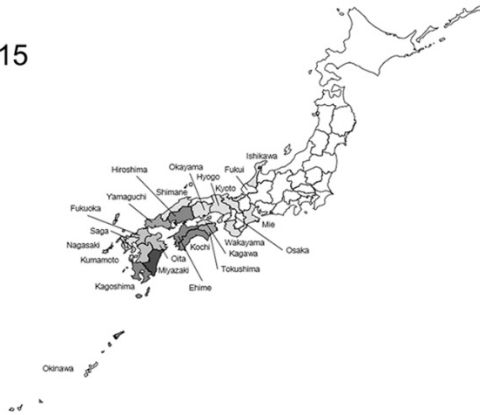

**C**  
2017 (as of October 31)

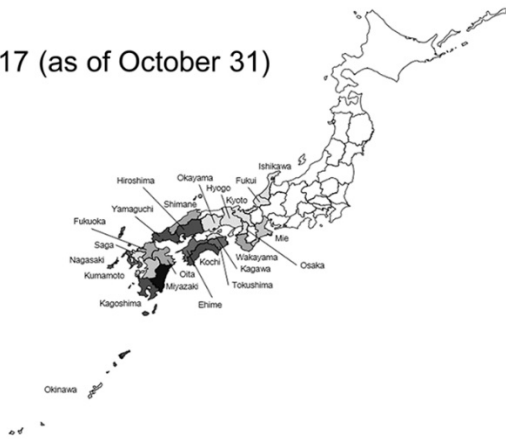

Cumulative  
no. patients

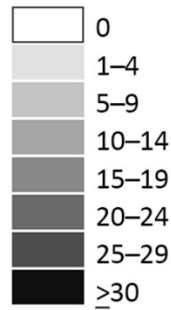

**Appendix Figure 1.** Geographic distribution of 303 SFTS cases in Japan (cumulative number), March 2013–October 2017. Cumulative number of reported patients by prefecture up to 2013 (A), up to 2015 (B), and up to October 31, 2017 (C).

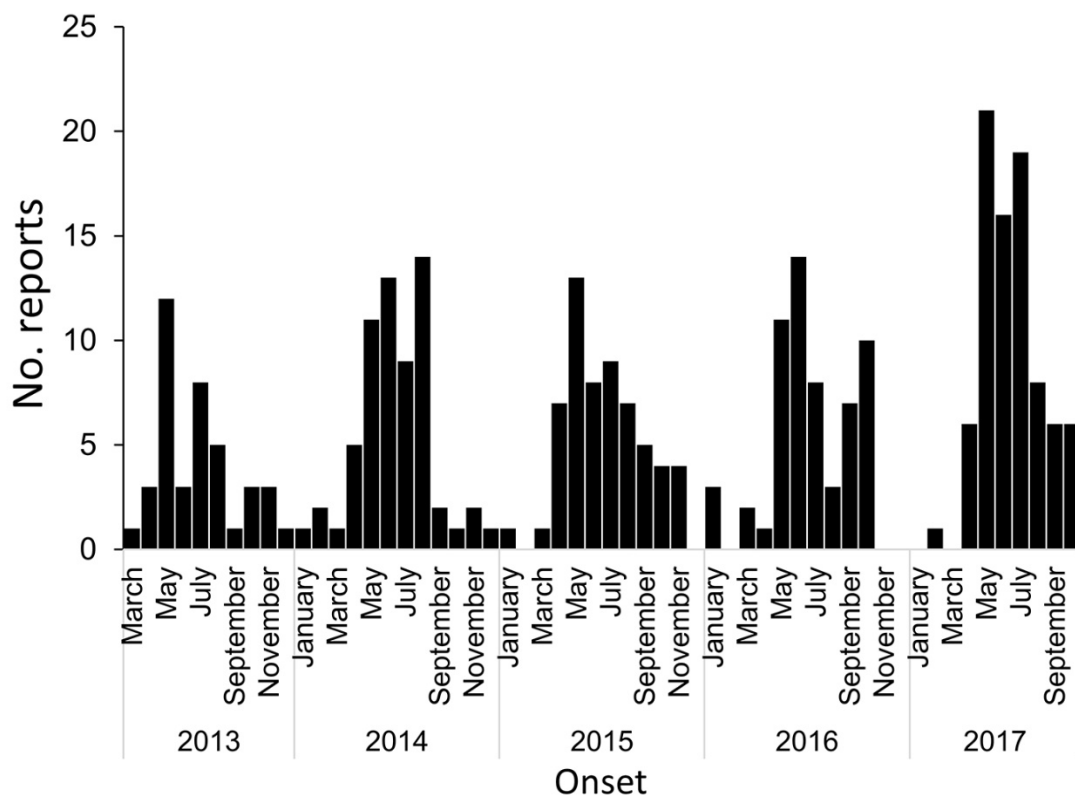

**Appendix Figure 2.** Seasonal distribution of 303 SFTS cases in Japan, March 2013–October 2017. Gray bars indicate the reported number of SFTS patients by month.
